# Supplementary material
Source: PubMed Central journal article supplement (PMC6063761)
Supplement: NIHMS976315-supplement-5.pdf [file NIHMS976315-supplement-5.pdf]

**A**

LLC CRISPR-LSD1, clone gRNA5-A29 (LSD1 KO1)  
 Target AACAGGCTGCTTCCTGAGAGGTCATTCGG-CAT  
 Reference AACAGGCTGCTTCCTGAGAGGTCATTCGGTCAT

LLC CRISPR-LSD1, clone gRNA5-B30 (LSD1 KO2)  
 Target AACAGGCTGCTTCCTGAGA-----GGTCAT  
 Reference AACAGGCTGCTTCCTGAGAGGTCATTCGGTCAT

**B**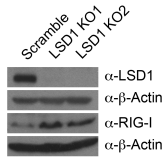**E**

B16 CRISPR-LSD1, clone gRNA4-7 (LSD1 KO1)  
 Target CACTTTCATTTTCTTCCCTCAGGTGGGGCCTTGA  
 Reference CACTTTCATTTTCTTCCCTCAGGTGGGGC-TTGA

B16 CRISPR-LSD1, clone gRNA5-4 (LSD1 KO2)  
 Target TCCTGAGAGGTCATTCGG-CATGGGGAAGTCGG  
 Reference TCCTGAGAGGTCATTCGGTCATGGGGAAGTCGG

**C**

D4m.3A CRISPR-LSD1, clone gRNA5-B37 (LSD1 KO1)  
 Target AACAGGCTGCTTCCTGAGAGGTCATTC--TCAT  
 Reference AACAGGCTGCTTCCTGAGAGGTCATTCGGTCAT

D4m.3A CRISPR-LSD1, clone gRNA3-8 (LSD1 KO2)  
 Target AATATTCATCTTCTGAG-GGTTGGCCAAGCTTTT one allele  
 Reference AATATTCATCTTCTGAGAGGTTGGCCAAGCTTTT  
 Target AATATTCATCTTC-----TGGCCAAGCTTTT the other allele  
 Reference AATATTCATCTTCTGAGAGGTTGGCCAAGCTTTT

**D**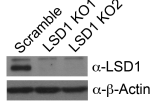**F**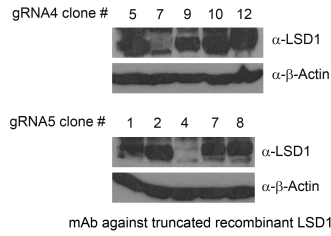**G**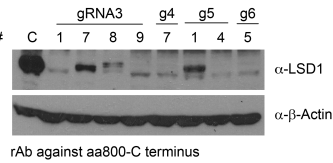**H**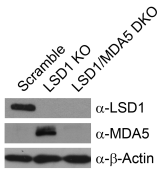**I**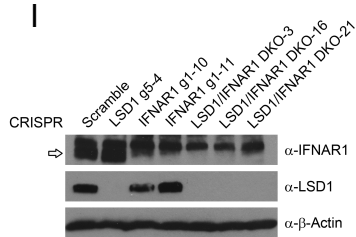**J**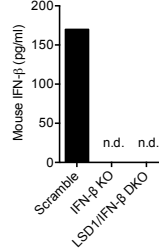

B16 CRISPR-MDA5, clone gRNA4-16 (MDA5 KO)  
 Target CATG-TGCCTGAATCCCTGCCCATGTTGCTGTT  
 Reference CATGGTGCCTGAATCCCTGCCCATGTTGCTGTT one allele  
 Target CATGG-GCCTGAATCCCTGCCCATGTTGCTGTT the other allele  
 Reference CATGGTGCCTGAATCCCTGCCCATGTTGCTGTT

B16 CRISPR-LSD1/MDA5, clone gRNA4-19 (LSD1/MDA5 DKO)  
 Target CATG-TGCCTGAATCCCTGCCCATGTTGCTGTT one allele  
 Reference CATGGTGCCTGAATCCCTGCCCATGTTGCTGTT  
 Target CATGG--CCTGAATCCCTGCCCATGTTGCTGTT the other allele  
 Reference CATGGTGCCTGAATCCCTGCCCATGTTGCTGTT

B16 CRISPR-IFNAR1, clone gRNA1-10 (IFNAR1 KO)  
 Target ACGG---TCAATGGGCAGTGTGACCTTTTTCAG one allele  
 Reference ACGGAGAGTCAATGGGCAGTGTGACCTTTTTCAG  
 Target ACGGAAGAGTCAATGGGCAGTGTGACCTTTTTC the other allele  
 Reference ACGG-AGAGTCAATGGGCAGTGTGACCTTTTTC

B16 CRISPR-LSD1/IFNAR1, clone gRNA1-16 (LSD1/IFNAR1 DKO)  
 Target ACG--GAGTCAATGGGCAGTGTGACCTTTTTCAG  
 Reference ACGGAGAGTCAATGGGCAGTGTGACCTTTTTCAG

B16 CRISPR-IFN-β, clone gRNA3-14 (IFN-β KO)  
 Target GGGCGGACTTCAAGATCC-TATGGAGATGACGG  
 Reference GGGCGGACTTCAAGATCCCTATGGAGATGACGG

B16 CRISPR-LSD1/IFN-β, clone gRNA3-16 (LSD1/IFN-β DKO)  
 Target GGGCGGACTTCAAGATCC-TATGGAGATGACGG  
 Reference GGGCGGACTTCAAGATCCCTATGGAGATGACGG

B16 CRISPR-LSD1/TLR3, clone gRNA6-7 (LSD1/TLR3 DKO)  
 Target ACTTTCAACAAAGGAGTAT-----CT  
 Reference ACTTTCAACAAAGGAGTATTTGGCACAGTTCT
