# Supplementary material
Source: PubMed Central journal article supplement (PMC6063761)

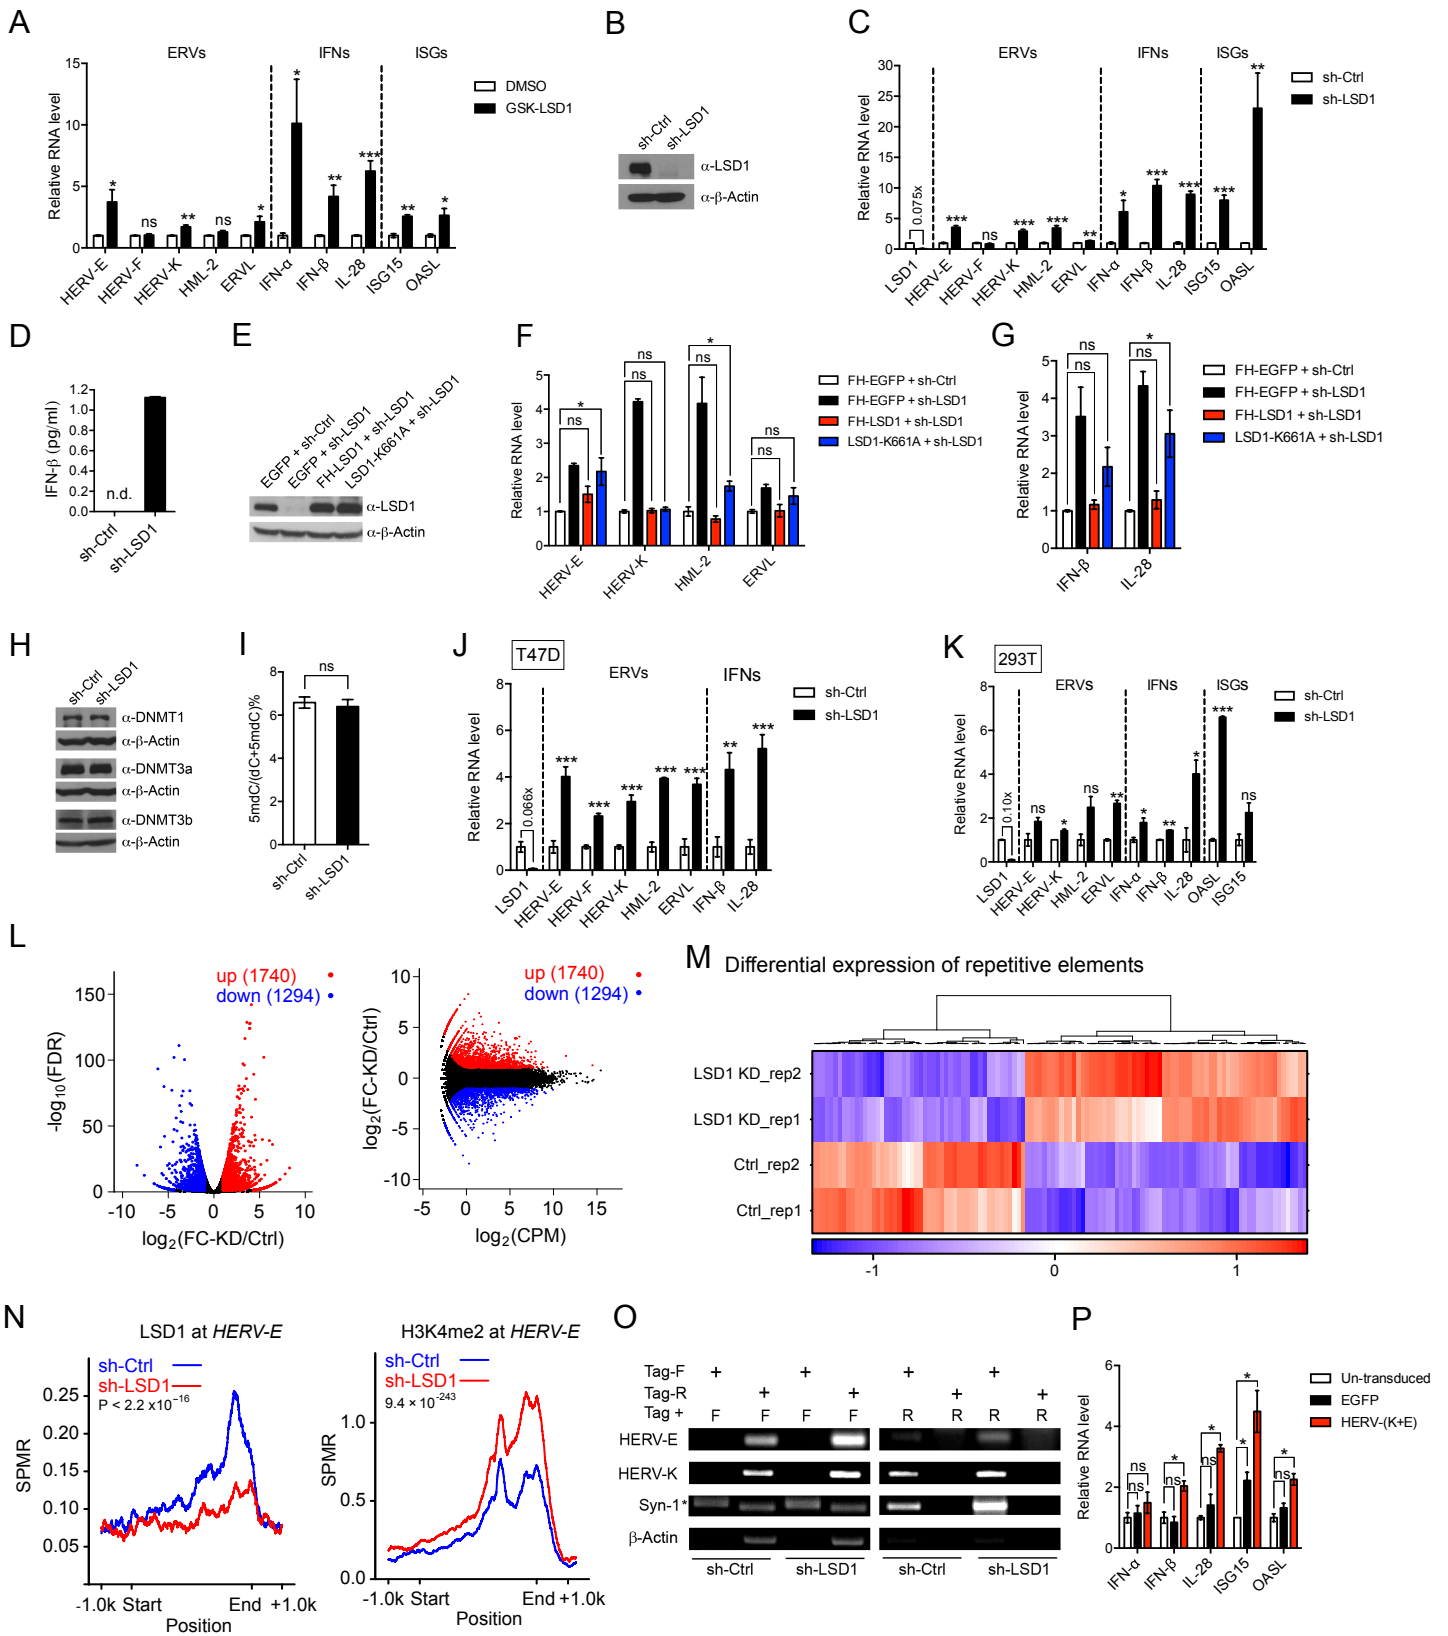

Supplement: NIHMS976315-supplement-1.pdf [file NIHMS976315-supplement-1.pdf]

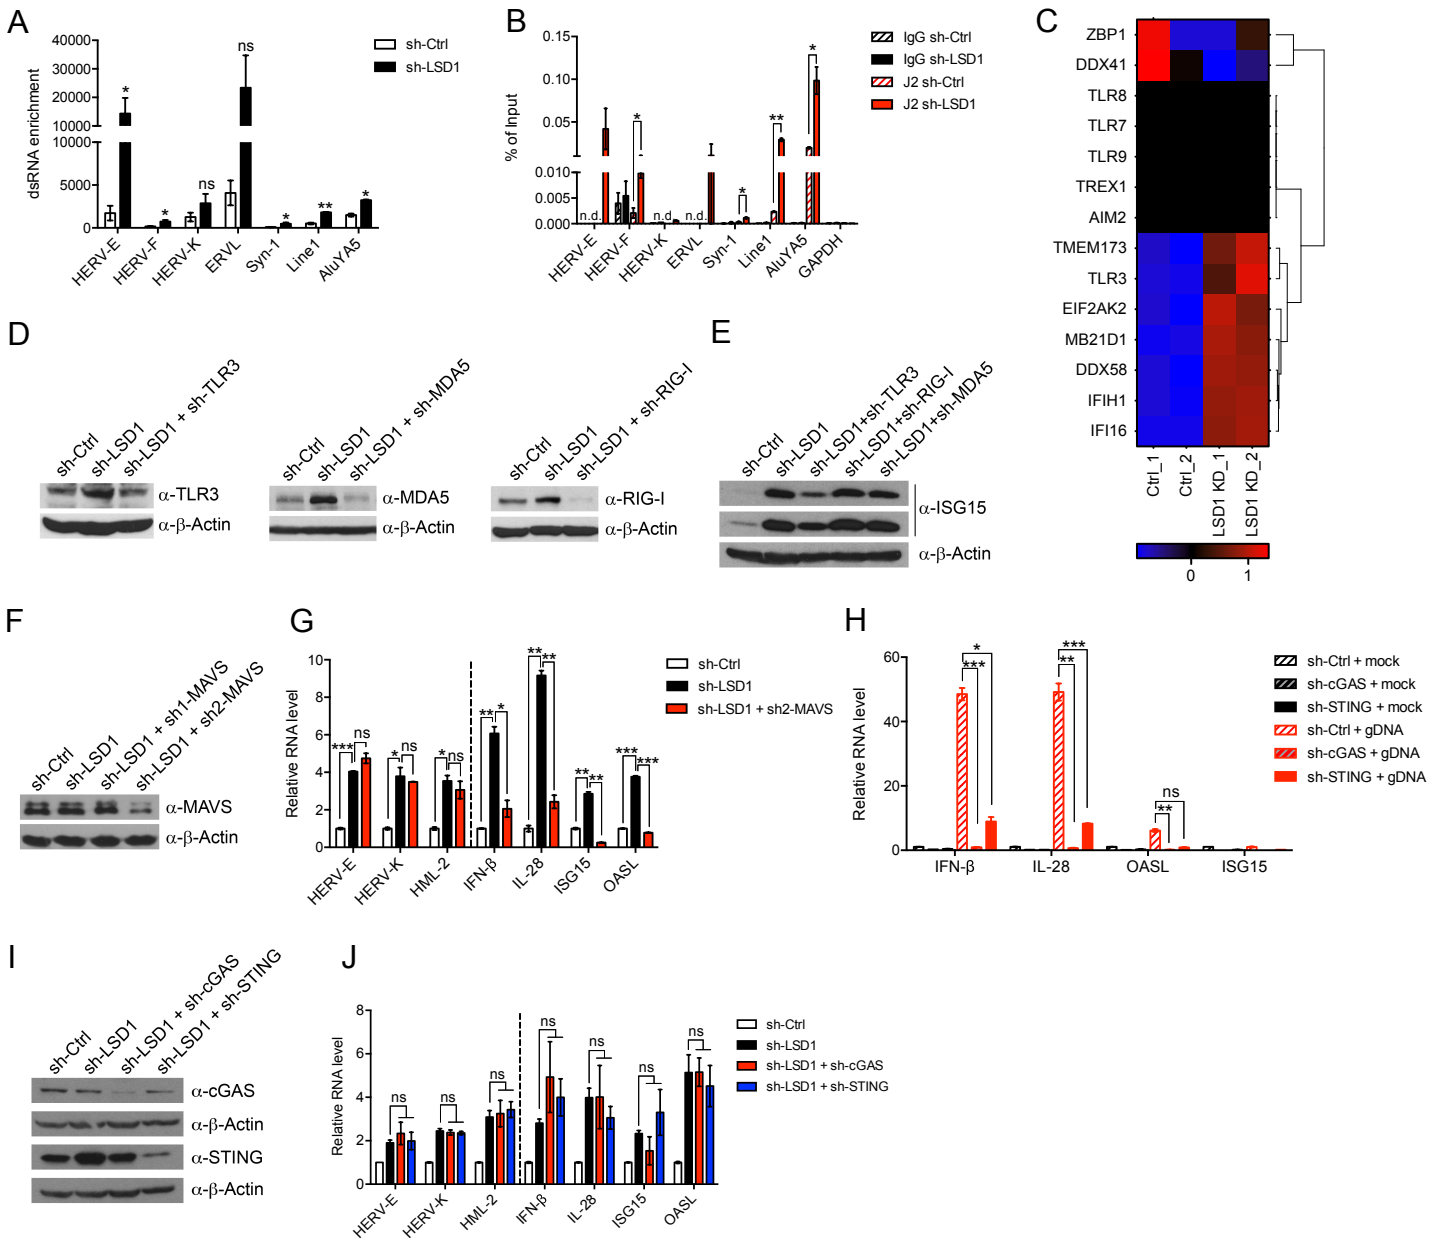

Supplement: NIHMS976315-supplement-2.pdf [file NIHMS976315-supplement-2.pdf]

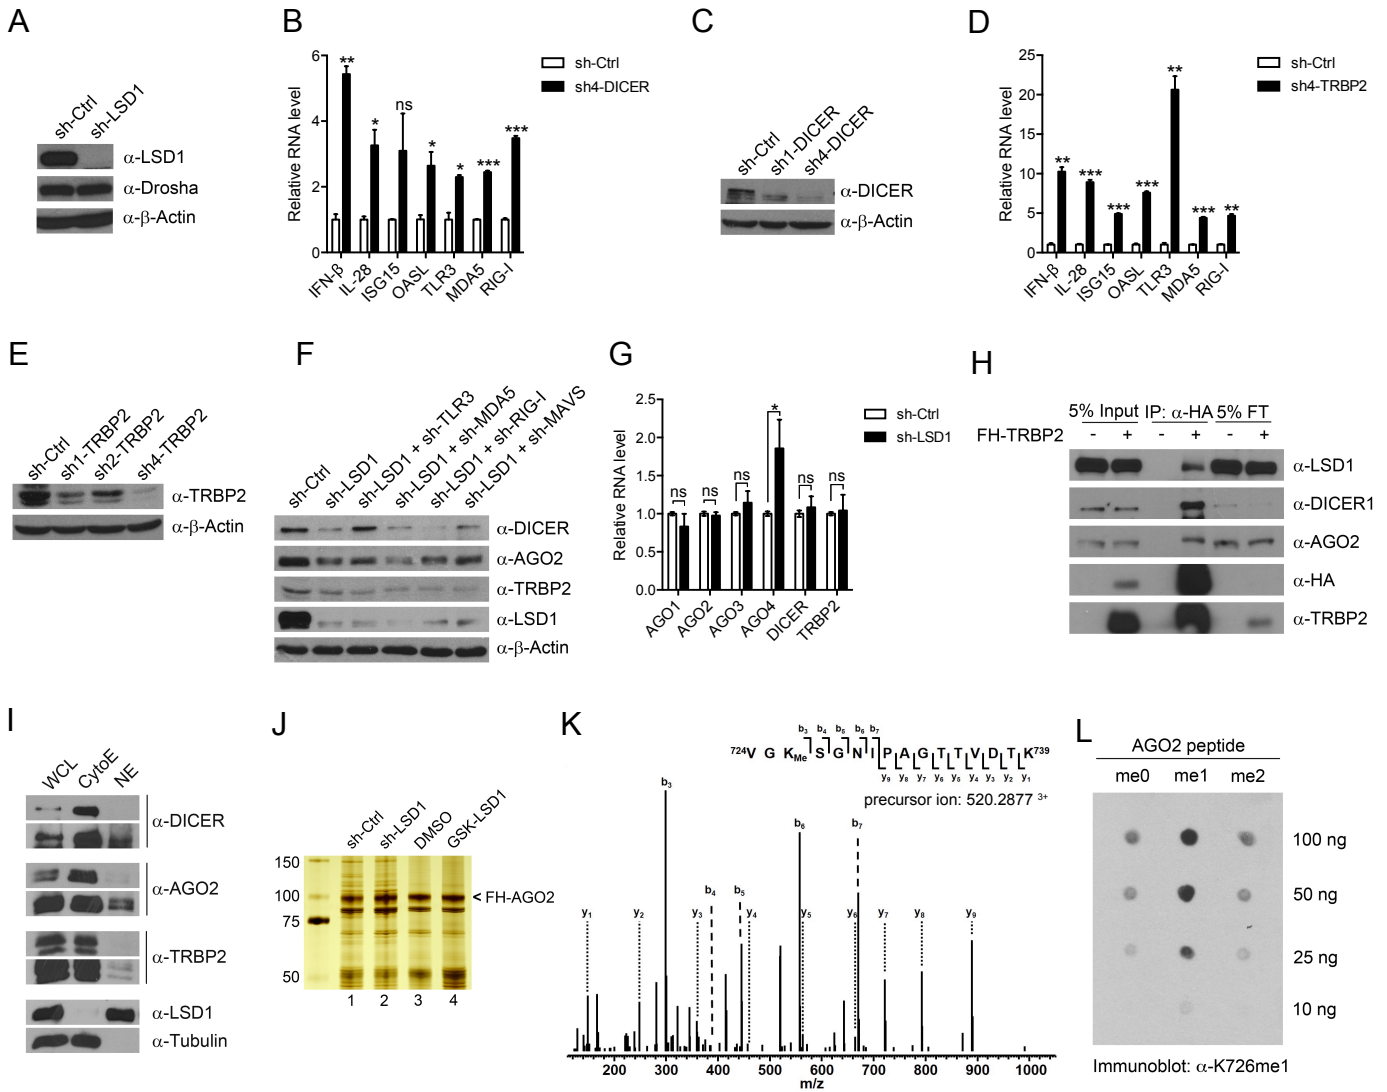

Supplement: NIHMS976315-supplement-3.pdf [file NIHMS976315-supplement-3.pdf]

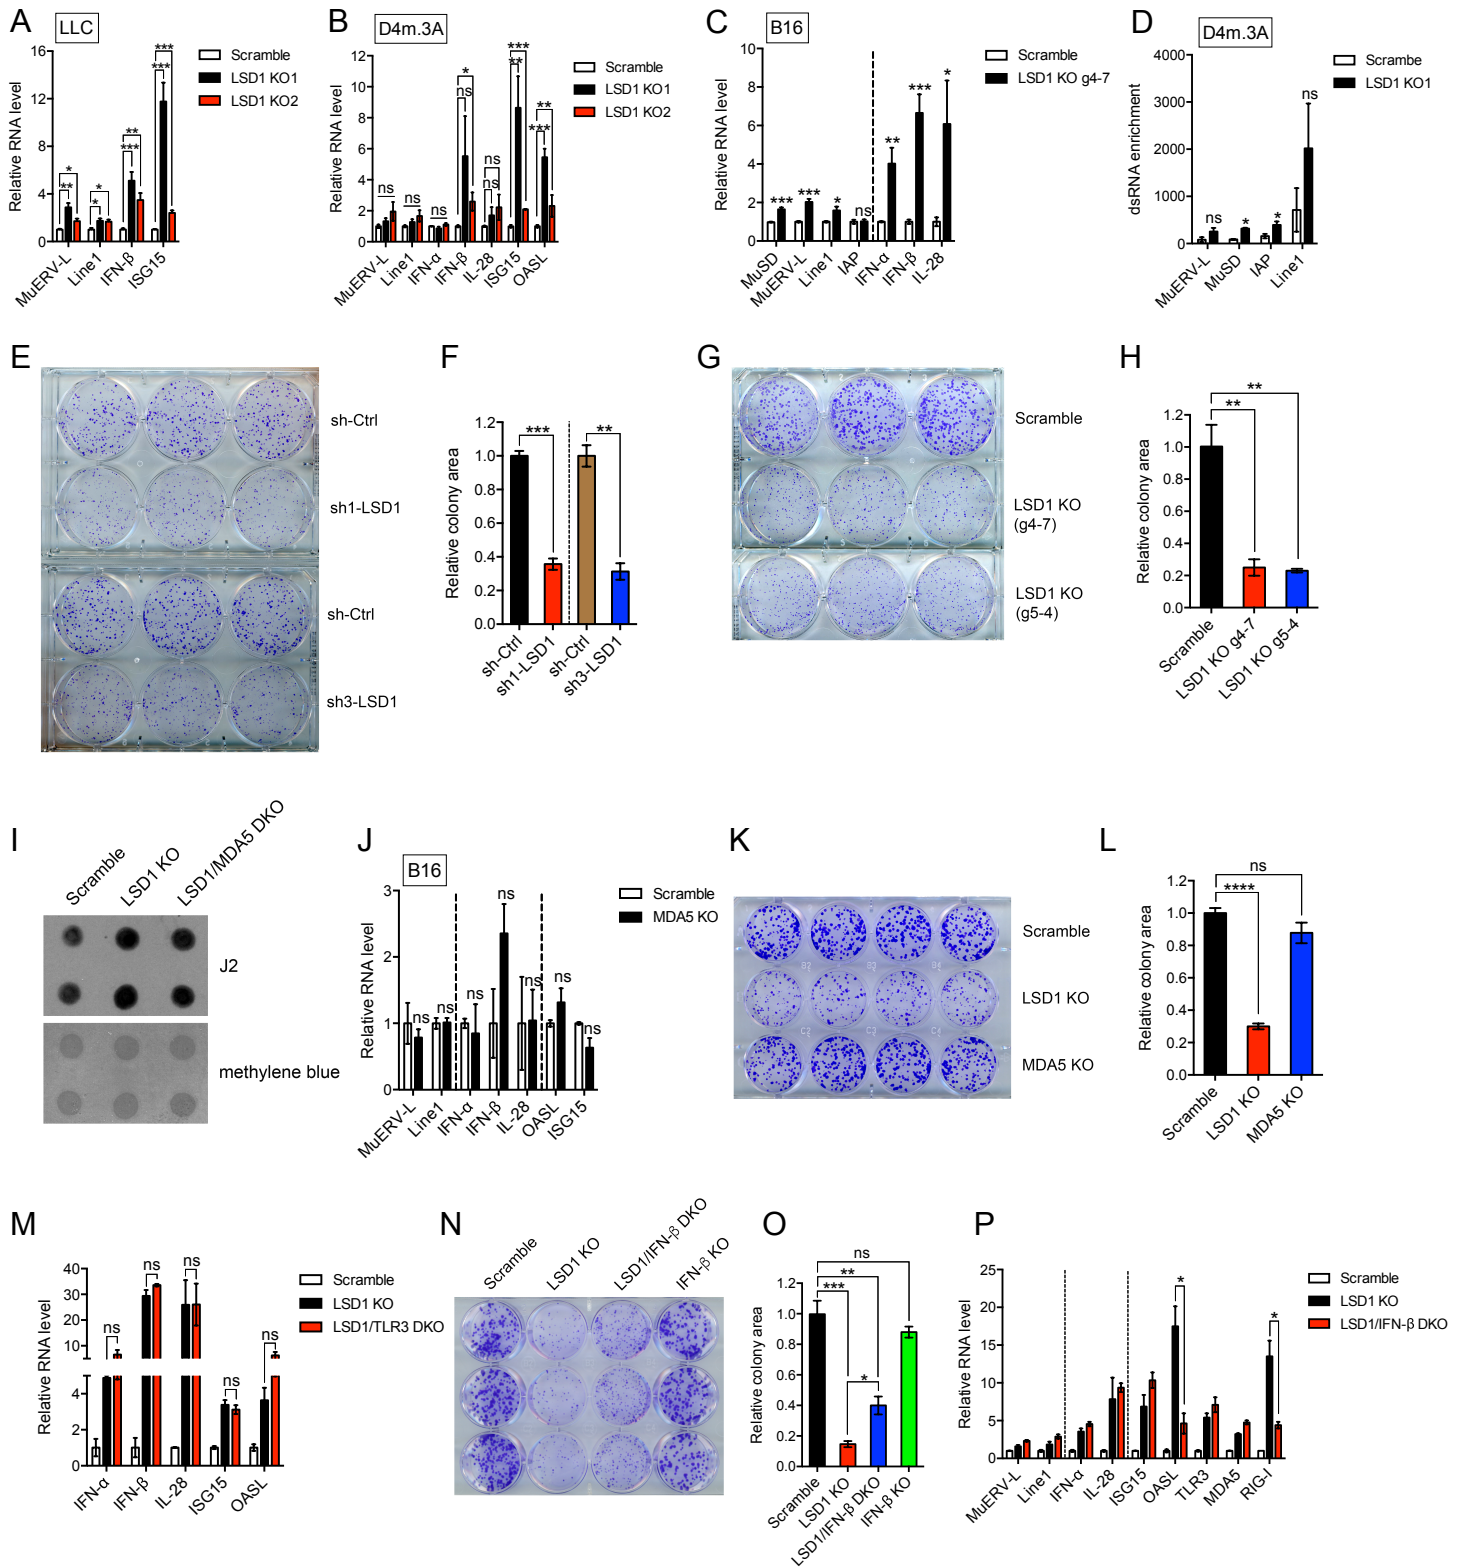

Supplement: NIHMS976315-supplement-4.pdf [file NIHMS976315-supplement-4.pdf]

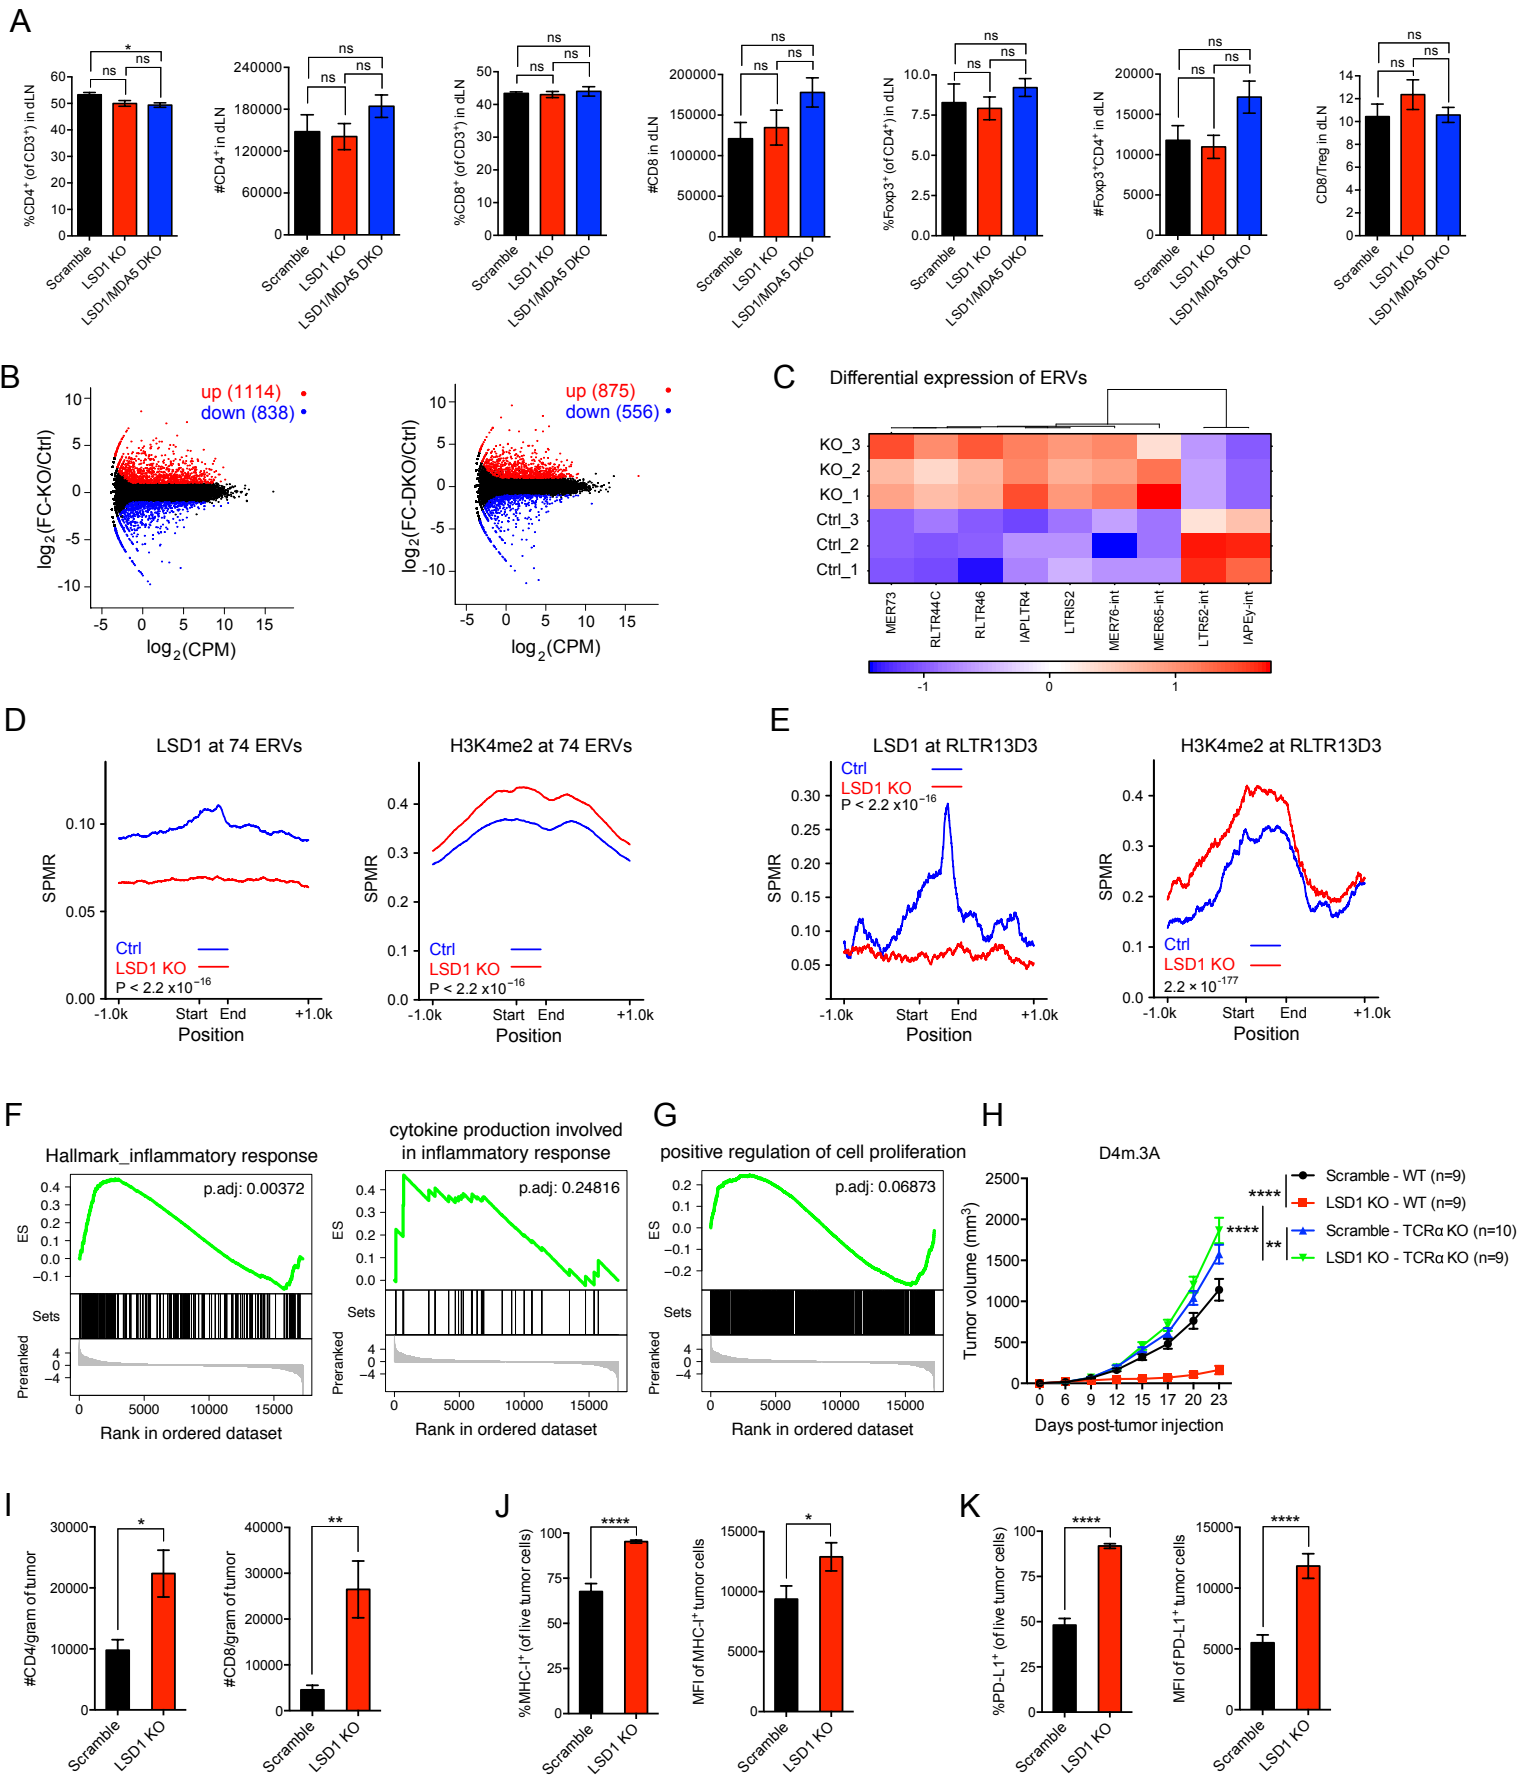

Supplement: NIHMS976315-supplement-6.pdf [file NIHMS976315-supplement-6.pdf]

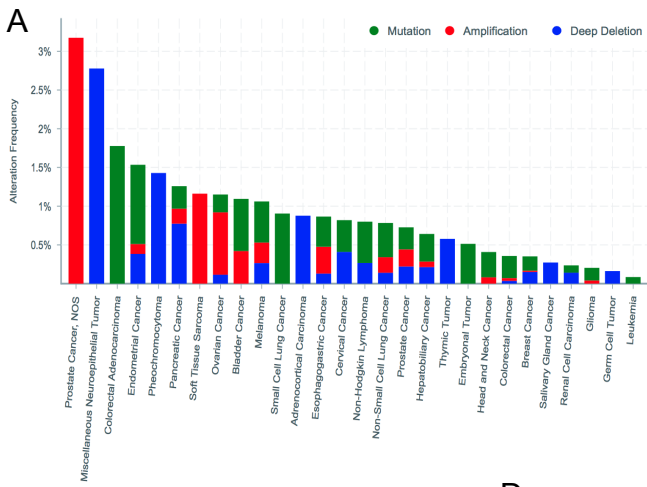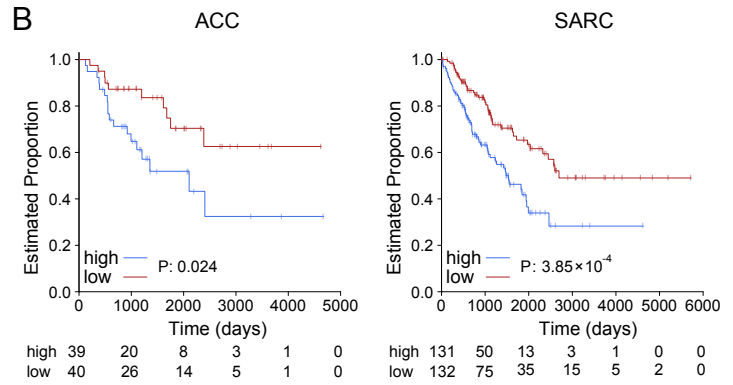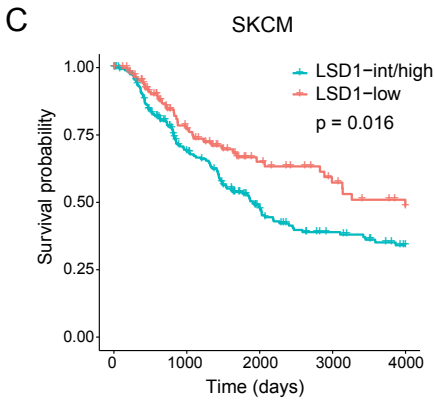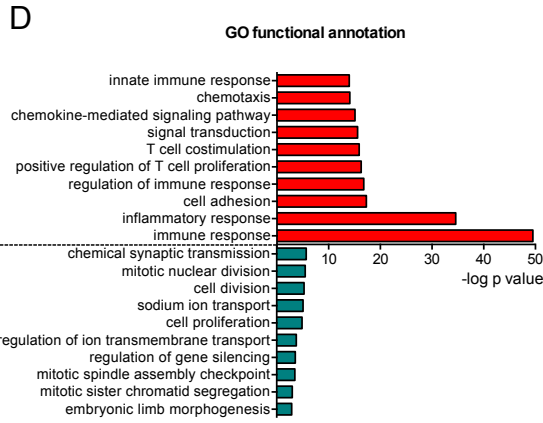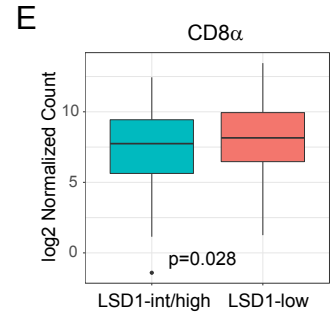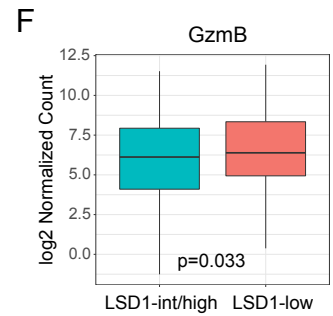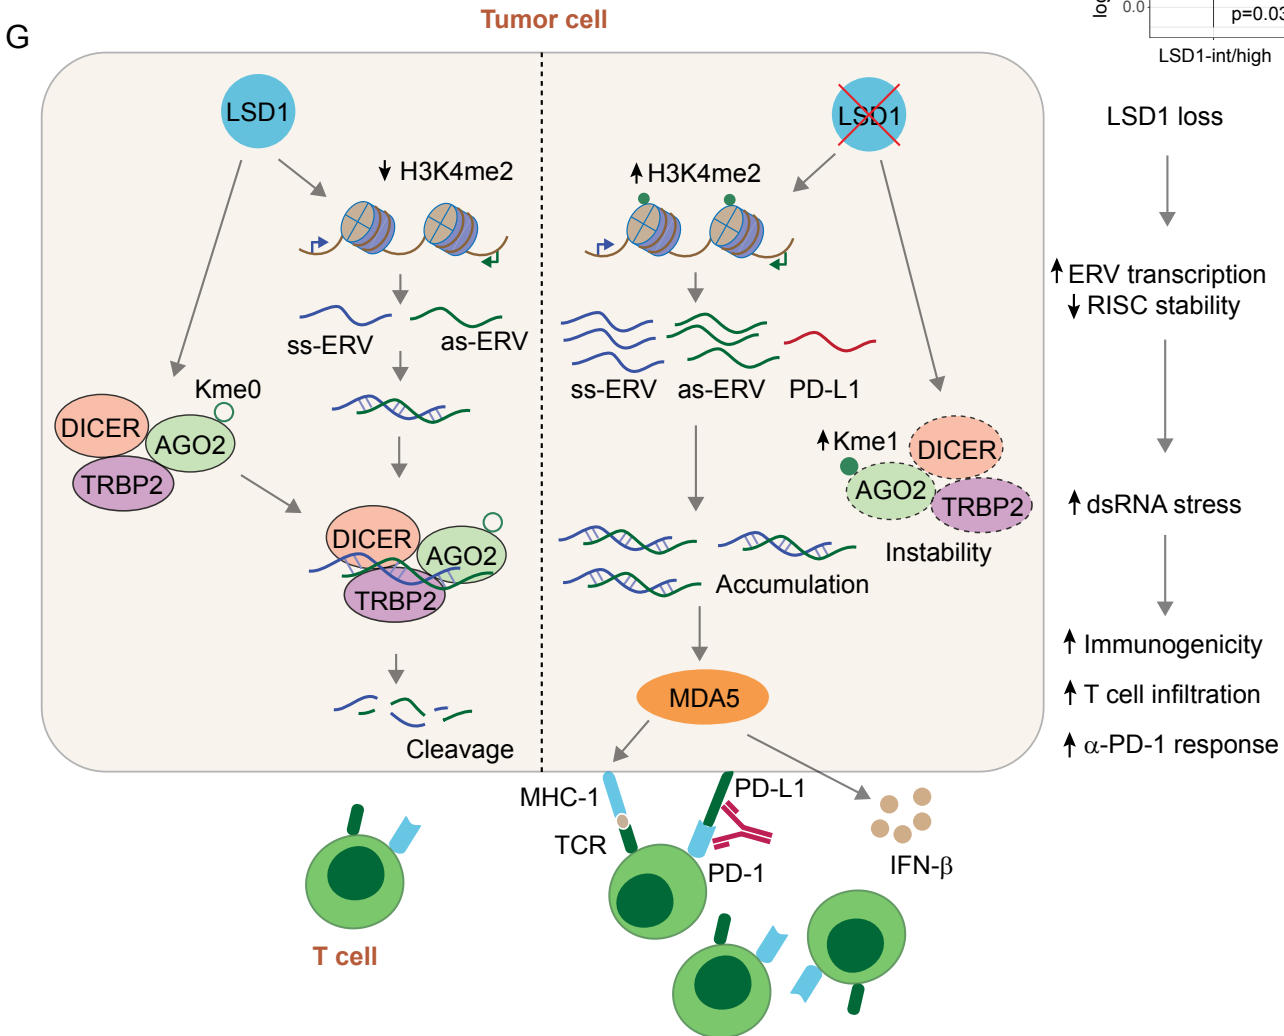

Supplement: NIHMS976315-supplement-7.pdf [file NIHMS976315-supplement-7.pdf]
